# Supplementary material
Source: Springer Nature journal article supplement (https://www.springermedizin.de/resource/supplementary/12936_2011_1918_MOESM13_ESM.pdf/9541982)
Supplement: MOESM13 [file 9541982]

# Studies of vivax malaria treatment *without* 8-aminoquinolines

Studies which enrolled : 5 - 5528 patients

N=31,620

Relapse (%)

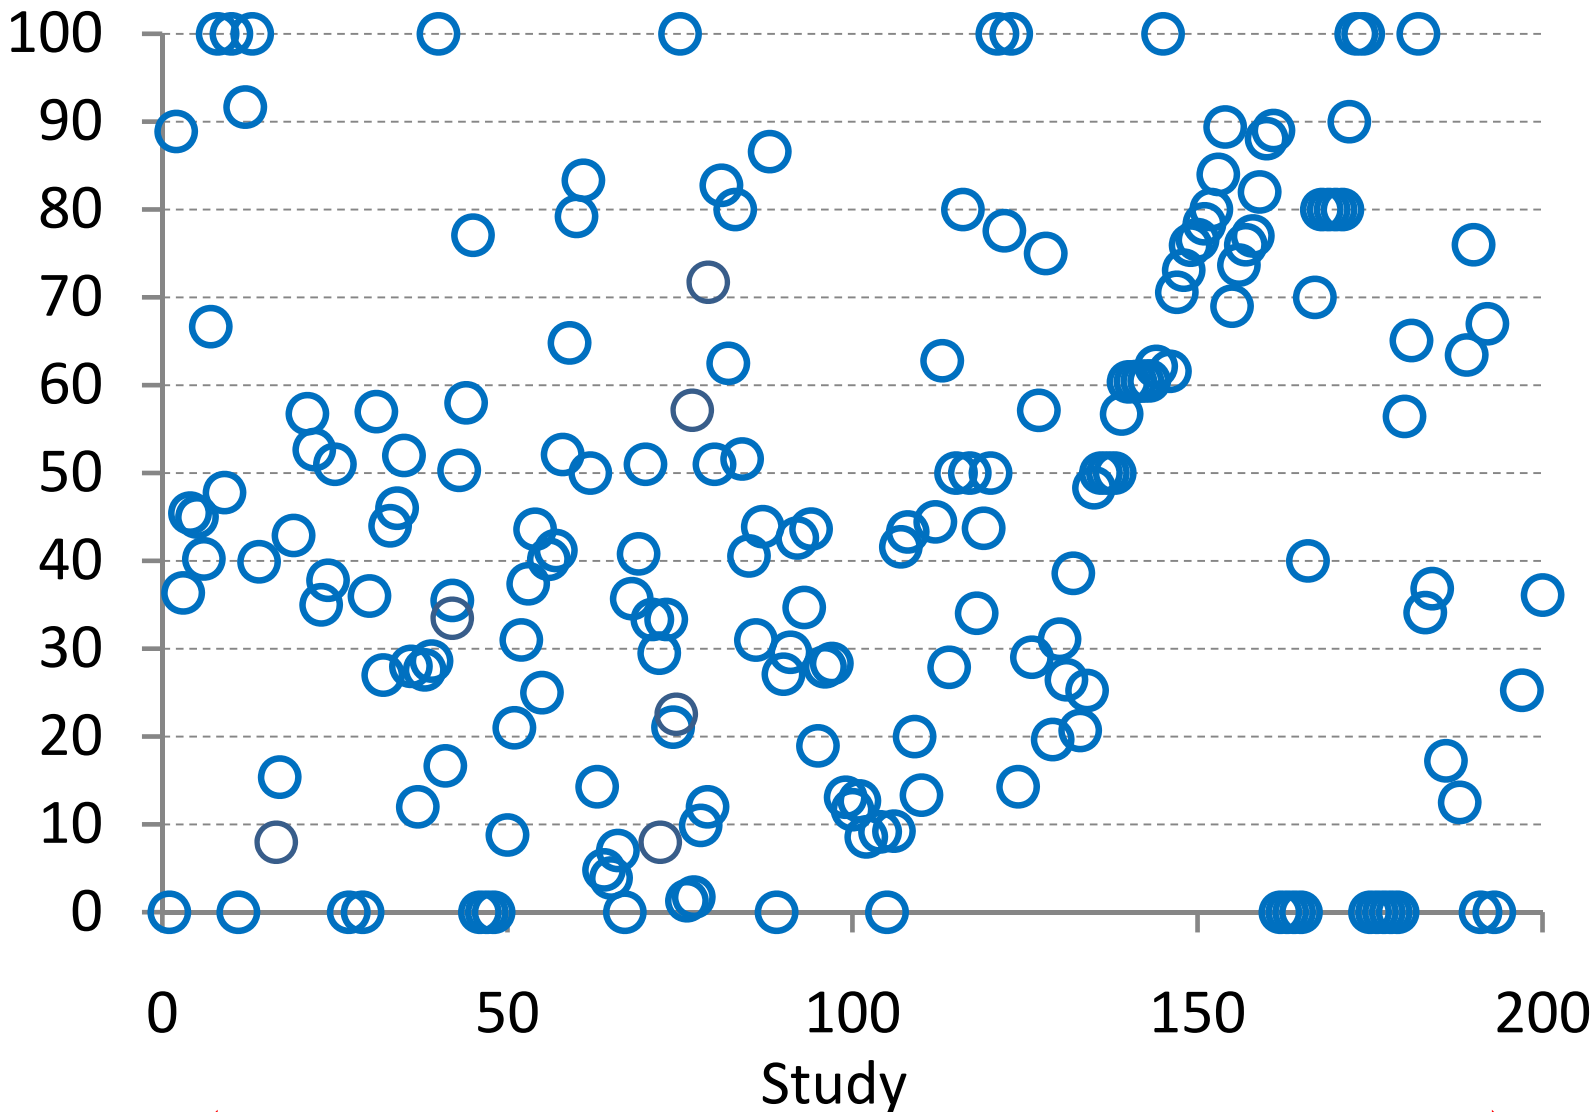

West

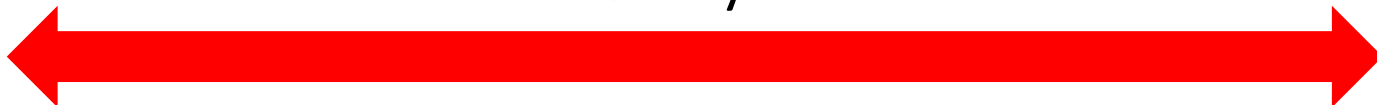

East
